# Supplementary material for: Identification of a Wheat-Psathyrostachys huashanica 7Ns Ditelosomic Addition Line Conferring Early Maturation by Cytological Analysis and Newly Developed Molecular and FISH Markers
Source: Front Plant Sci. 2021 Dec 9;12:784001. doi: 10.3389/fpls.2021.784001 (PMC8695443; doi:10.3389/fpls.2021.784001)
Supplement: Supplementary Table 3 — Specific amplification of 7Ns chromosome markers in wheat-related species. [file Table_3.XLSX]

## Sheet: Sheet1
Supplementary Table 3 Specific amplification of P. huashanica 7Ns chromosome markers in wheat-related species
Speicific Markers	CS	CSph2b	DT23	PI142824 (Au)	PI560527 (Bsp)	PI508264 (D)	ZY3156 (Ns)	PI314082 (Ns)	QL (R)	ZY11001 (H)	PI499389 (P)	PI470279 (V)	W6-10232 (Eb)	PI531718 (Ee)	PI228391 (St)	ZY07023 (NsXm)	ZY09002 (NsXm)	PI531578 (NsXm)	PI440326 (NsXm)	PI294582 (NsXm)	PI232252 (NsXm)
PH7Ns-1	0	0	1	0	0	0		1	0	0	0	0	0	0	0	1	1	1	1	1	1
PH7Ns-3	0	0	1	0	0	0	1	1	0	0	0	0	0	0	0	1	1	1	1	1	1
PH7Ns-4	0	0	1	0	0	0	1	1	0	0	1	0	1	1	1	1	1	1	1	1	1
PH7Ns-5	0	0	1	0	0	0	1	1	0	0	0	0	0	0	0	1	1	1	1	1	1
PH7Ns-6	0	0	1	0	0	0	1	1	0	0	1	0	1	1	1	1	1	1	1	1	1
PH7Ns-7	0	0	1	0	0	1	1	1	0	1	0	1	0	0	0	1	1	1	0	0	1
PH7Ns-8	0	0	1	0	0	0	1	1	0	0	1	0	1	1	0	1	1	1	1	1	1
PH7Ns-9	0	0	1	0	0	0	1	0	0	0	0	0	0	1	0	0	0	1	0	0	0
PH7Ns-11	0	0	1	0	0	0	1	1	0	0	0	0	0	1	0	0	0	0	1	0	0
PH7Ns-12	0	0	1	0	0	0	1	0	0	0	0	0	0	0	0	1	0	0	0	0	0
PH7Ns-13	0	0	1	1	0	0	1	1	0	0	0	0	0	0	0	1	1	1	1	1	1
PH7Ns-14	0	0	1	0	0	0	1	1	0	0	0	0	0	0	0	0	0	0	0	1	1
PH7Ns-15	0	0	1	0	0	0	1	0	0	0	0	0	0	0	0	0	0	0	0	0	0
PH7Ns-17	0	0	1	0	0	0	1	0	0	0	0	0	0	1	0	0	0	1	1	0	0
PH7Ns-18	0	0	1	0	0	0	1	0	0	0	0	0	0	0	0	0	0	0	0	1	0
PH7Ns-19	0	0	1	0	0	0	1	1	0	0	0	0	0	0	0	1	1	1	1	1	1
PH7Ns-20	0	0	1	0	0	0	1	1	0	0	0	0	1	0	0	1	1	1	1	1	1
PH7Ns-21	0	0	1	0	0	0	1	1	0	0	1	0	0	1	0	1	1	1	1	1	1
PH7Ns-22	0	0	1	0	0	0	1	1	0	0	1	0	0	1	0	1	1	1	1	1	1
PH7Ns-23	0	0	1	0	0	0	1	1	0	0	0	1	0	1	0	0	1	1	1	1	1
PH7Ns-24	0	0	1	0	0	0	1	1	0	0	0	0	0	0	0	1	1	1	1	1	1
PH7Ns-25	0	0	1	0	0	0	1	1	0	0	0	0	1	1	1	1	1	1	1	1	1
PH7Ns-26	0	0	1	0	0	0	1	1	0	0	1	0	1	0	0	1	1	1	1	1	1
PH7Ns-27	0	0	1	0	0	0	1	1	0	0	0	0	0	0	0	1	1	1	1	1	1
PH7Ns-29	0	0	1	1	1	1	1	1	1	1	1	0	0	0	0	1	1	1	0	0	1
PH7Ns-30	0	0	1	1	1	1	1	1	0	1	1	1	1	1	1	1	1	1	0	0	1
PH7Ns-31	0	0	1	1	0	0	1	1	0	1	0	1	0	0	0	1	1	1	1	1	1
PH7Ns-32	0	0	1	0	0	0	1	1	0	0	0	0	0	0	0	1	1	1	1	1	1
PH7Ns-33	0	0	1	0	0	0	1	1	0	0	0	0	0	0	0	0	0	0	1	1	1
PH7Ns-34	0	0	1	1	1	1	1	1	0	1	0	1	0	1	0	1	1	1	0	0	1
PH7Ns-35	0	0	1	0	0	0	1	1	0	0	0	0	0	1	0	1	1	1	1	1	1
PH7Ns-36	0	0	1	0	0	0	1	0	0	1	0	0	1	1	0	0	0	0	0	1	1
PH7Ns-37	0	0	1	0	0	0	1	0	0	0	0	0	0	0	0	0	0	0	0	0	0
PH7Ns-38	0	0	1	0	0	0	1	1	0	0	0	0	0	0	0	1	1	1	1	1	1
PH7Ns-39	0	0	1	0	0	0	1	1	1	0	0	0	0	0	0	1	0	0	0	0	0
PH7Ns-40	0	0	1	0	0	0	1	0	0	0	0	0	1	0	0	0	0	0	1	0	0
PH7Ns-42	0	0	1	0	0	0	1	1	1	0	0	0	0	0	0	0	0	1	1	0	0
PH7Ns-43	0	0	1	0	0	0	1	1	0	0	0	0	0	0	0	0	0	0	0	0	0
PH7Ns-44	0	0	1	0	0	0	1	1	1	0	0	0	0	0	0	1	1	1	1	1	1
PH7Ns-45	0	0	1	0	0	0	1	1	0	0	1	0	1	0	0	1	1	1	1	1	1
PH7Ns-47	0	0	1	0	0	0	1	1	1	0	0	0	0	0	0	1	1	1	1	1	1
PH7Ns-48	0	0	1	0	0	0	1	1	0	0	0	0	0	0	0	0	1	1	1	0	0
PH7Ns-49	0	0	1	0	0	0	1	1	0	0	0	0	0	0	0	0	0	0	0	0	0
PH7Ns-50	0	0	1	0	0	0	1	1	0	0	0	0	0	0	0	1	1	1	1	1	1
PH7Ns-52	0	0	1	0	0	0	1	0	0	0	0	0	1	1	0	0	1	0	1	0	0
Total number	0	0	45	5	3	4	44	36	5	6	9	5	11	15	4	29	30	32	31	28	31
Note: “1” or “0” indicates the presence or absence of the specific band, respectively.
